# Supplementary material for: Cardiovascular Risk in Patients with Dyslipidemia and Their Degree of Control as Perceived by Primary Care Physicians in a Survey—TERESA-Opinion Study
Source: MDPI journal article supplement (doi:10.3390/ijerph20032388), 2023-01-29
Supplement: s1 [file s1]

---

## ***Questionnaire for Physicians***

---

### **Details of Physicians**

Age \_\_\_\_\_ years

Autonomous community \_\_\_\_\_ (list)

Population:

- ☐ >20,000 inhabitants
- ☐ 5,000-20,000 inhabitants
- ☐ <5,000 inhabitants

Type of healthcare centre:

- ☐ Health centre
- ☐ Rural practice

Teaching centre (YES/NO)

Attending physician (YES/NO)

Tutor of degree students (YES/NO)

Number of patients registered at your practice: \_\_\_\_\_

- ☐ <500 patients
- ☐ 500-1000 patients
- ☐ 1000-1500 patients
- ☐ >1500 patients

## Situation of dyslipidemia and its treatment

From the patients on your list, what percentage of patients older than 40 do you consider to have dyslipidemia?

\_\_\_\_\_ %

Among these patients, in what percentage do you use the following therapeutic strategies?

|                                            |   |
|--------------------------------------------|---|
| High-intensity statin and ezetimibe        | % |
| Moderate-intensity statin and ezetimibe    | % |
| High-intensity statin                      | % |
| Moderate-intensity statin                  | % |
| Low-intensity statin                       | % |
| Fibrate, in monotherapy                    | % |
| Ezetimibe, in monotherapy                  | % |
| Bempedoic acid                             | % |
| Others (for instance, nutraceuticals, ...) | % |

\* High-intensity statins: *atorvastatin 80mg* and *rosuvastatin 20mg*

^ Moderate-intensity statins: *fluvastatin prolib (80mg)*, *pravastatin (40mg)*, *lovastatin (40mg)*, *simvastatin (10mg, 20mg and 40mg)*, *pitavastatin (1mg, 2mg and 4mg)*, *atorvastatin (10mg, 20mg and 40mg)* and *rosuvastatin (5mg and 10mg)* *simvastatin*

# Low-intensity statins: *Fluvastatin (10mg and 20mg)*, *pravastatin (10mg and 20mg)* and *lovastatin (20mg)*

*Nutraceuticals: monacolin K, policosanols, soy sterols.*

Indicate, if any, the number/percentage of patients in your list who are treated with PCSK9 inhibitors \_\_\_\_\_ %

Of your patients with dyslipidemia older than 80, what percentage is being treated with statins

\_\_\_\_\_ %

Indicate in which percentage the patients on your list with lipid-lowering treatment are distributed:

|                                      |   |
|--------------------------------------|---|
| Recurring events in the last 2 years | % |
| Very high risk                       | % |
| High risk                            | % |

|               |   |
|---------------|---|
| Moderate risk | % |
| Low risk      | % |

Arrange in decreasing order, which comorbidities you consider most frequently associated with dyslipidemia:

|                           |  |
|---------------------------|--|
| Diabetes Mellitus         |  |
| Obesity                   |  |
| Coronary heart disease    |  |
| Cerebrovascular disease   |  |
| Peripheral artery disease |  |
| Hypertension              |  |
| Chronic kidney disease    |  |

Indicate what percentage of your patients with dyslipidemia present the following comorbidities:

|                                              |   |
|----------------------------------------------|---|
| Diabetes Mellitus                            | % |
| Cardiovascular disease                       | % |
| Diabetes Mellitus and cardiovascular disease | % |
| Chronic kidney disease                       | % |

Arrange in decreasing order, the statins you use most:

|                   |  |
|-------------------|--|
| Rosuvastatin 40mg |  |
| Rosuvastatin 30mg |  |
| Rosuvastatin 20mg |  |
| Rosuvastatin 10mg |  |
| Rosuvastatin 5mg  |  |
| Atorvastatin 80mg |  |
| Atorvastatin 60mg |  |

|                         |  |
|-------------------------|--|
| Atorvastatin 40mg       |  |
| Atorvastatin 30mg       |  |
| Atorvastatin 20mg       |  |
| Atorvastatin 10mg       |  |
| Pitavastatin 4mg        |  |
| Pitavastatin 2mg        |  |
| Pitavastatin 1mg        |  |
| Simvastatin 40mg        |  |
| Simvastatin 20mg        |  |
| Simvastatin 10 mg       |  |
| Lovastatin 40mg         |  |
| Lovastatin 20mg         |  |
| Pravastatin 40mg        |  |
| Pravastatin 20mg        |  |
| Pravastatin 10mg        |  |
| Fluvastatin prolib 80mg |  |
| Fluvastatin 40mg        |  |
| Fluvastatin 20mg        |  |
| None                    |  |

What % of patients do you have with fixed combination treatment?

|                          |   |
|--------------------------|---|
| Simvastatin + Ezetimibe  | % |
| Atorvastatin + Ezetimibe | % |
| Rosuvastatin + Ezetimibe | % |
| Statin + Fibrate         | % |
| Bempedoic + Ezetimibe    | % |

Indicate, in each clinical scenario proposed, in what percentage you use each of the pharmacological strategies mentioned:

|  | Cardiovascular<br>disease (%) | Diabetes<br>Mellitus (%) | Dyslipidemia<br>without CVD<br>or DM (%) |
|--|-------------------------------|--------------------------|------------------------------------------|
|  |                               |                          |                                          |

|                                          |   |  |  |
|------------------------------------------|---|--|--|
| Lifestyle modification, only             |   |  |  |
| High-intensity statin* and ezetimibe     | % |  |  |
| Moderate-intensity statin^ and ezetimibe | % |  |  |
| High-intensity statin*                   | % |  |  |
| Moderate-intensity statin^               | % |  |  |
| Low-intensity statin#                    | % |  |  |
| Fibrate                                  | % |  |  |
| Bempedoic                                |   |  |  |
| Others                                   | % |  |  |

\* High-intensity statins: *atorvastatin 80mg and rosuvastatin 20mg*

^ Moderate-intensity statins: *fluvastatin prolib (80mg), pravastatin (40mg), lovastatin (40mg), simvastatin (10mg, 20mg and 40mg), pitavastatin (1mg, 2mg and 4mg), atorvastatin (10mg, 20mg and 40mg) and rosuvastatin (5mg and 10mg) simvastatin*

# Low-intensity statins: *Fluvastatin (10mg and 20mg), pravastatin (10mg and 20mg) and lovastatin (20mg)*

## Therapeutic objectives

For the following scenarios, which do you consider an adequate LDL-C control objective?

|                                      |       |
|--------------------------------------|-------|
| Recurring events in the last 2 years | mg/dl |
| Very high risk                       | mg/dl |
| High risk                            | mg/dl |
| Moderate risk                        | mg/dl |
| Low risk                             | mg/dl |

Indicate in what percentage you think that your patients achieve LDL objectives in the following scenarios:

|                                      |   |
|--------------------------------------|---|
| Recurring events in the last 2 years | % |
| Very high risk                       | % |
| High risk                            | % |
| Moderate risk                        | % |
| Low risk                             | % |

|                                            |   |
|--------------------------------------------|---|
| Diabetes Mellitus                          | % |
| Cardiovascular disease                     | % |
| Cardiovascular disease + Diabetes Mellitus | % |
| Chronic kidney disease                     | % |

## Adverse events

Indicate approximately how often your patients have presented adverse events associated with statins \_\_\_\_\_%

In these cases, in what percentage have you had to modify the treatment with statins? \_\_\_\_\_%

If you have modified the treatment, indicate in what percentage you have made use of the following strategies:

|                                         |   |
|-----------------------------------------|---|
| Discontinue the statin                  | % |
| Reduce the dose of the same statin      | % |
| Switch to another statin                | % |
| Switch to another drug                  | % |
| Indicate which you use most frequently: |   |
| Switch to nutraceutical                 | % |
| Others:                                 | % |
| Indicate which:                         |   |

According to your clinical practice, which statin do you consider the safest as regards adverse events? (please, choose only one)

- ☐ Rosuvastatin
- ☐ Atorvastatin
- ☐ Pitavastatin
- ☐ Simvastatin
- ☐ Lovastatin

- ☐ Pravastatin
- ☐ Fluvastatin
- ☐ They are all equal
